# Supplementary figures and images for: Luteolin Improves Perivascular Adipose Tissue Profile and Vascular Dysfunction in Goto-Kakizaki Rats
Source: MDPI journal article supplement (doi:10.3390/ijms222413671), 2021-12-20

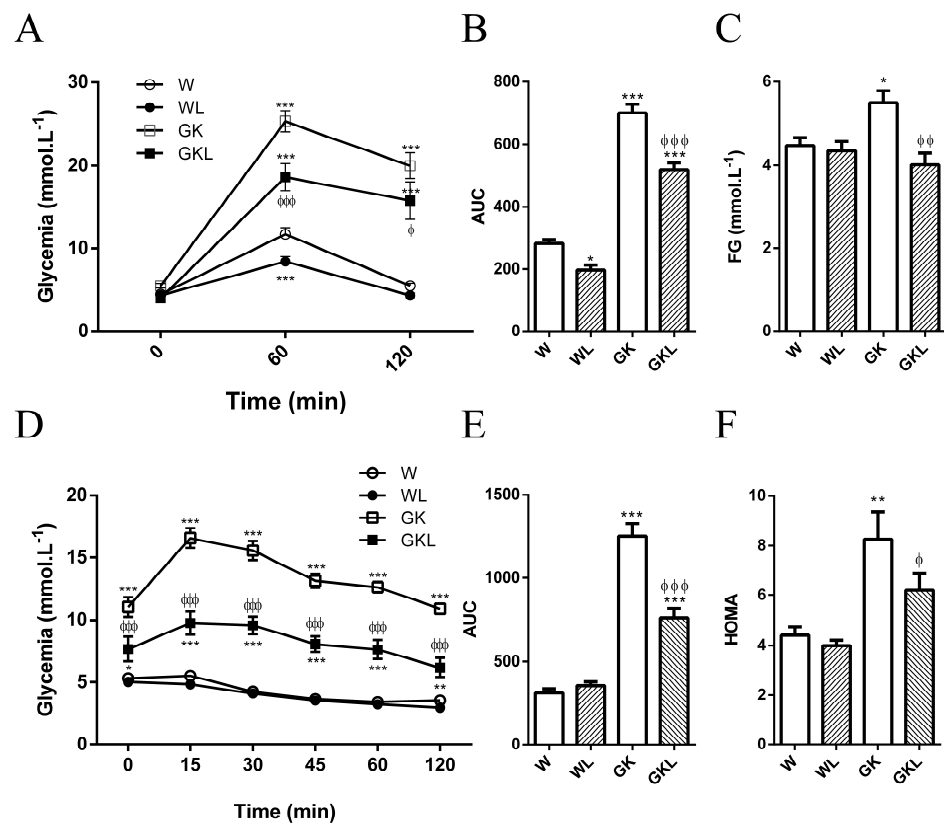

Figure S1

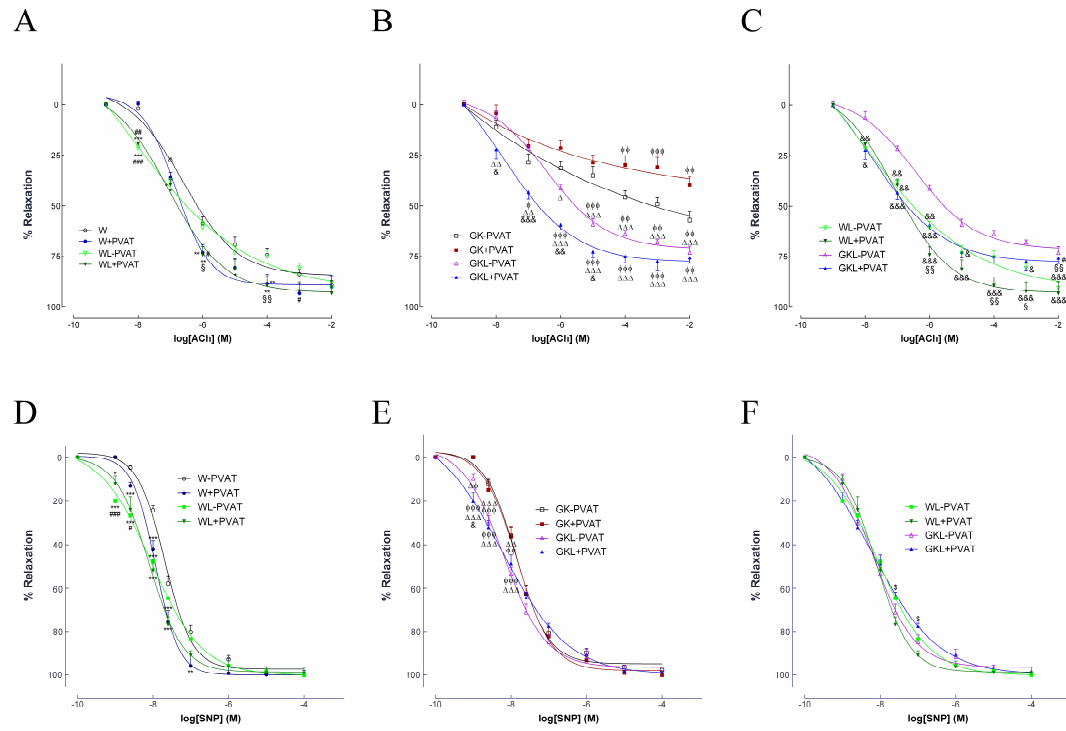

Figure S2

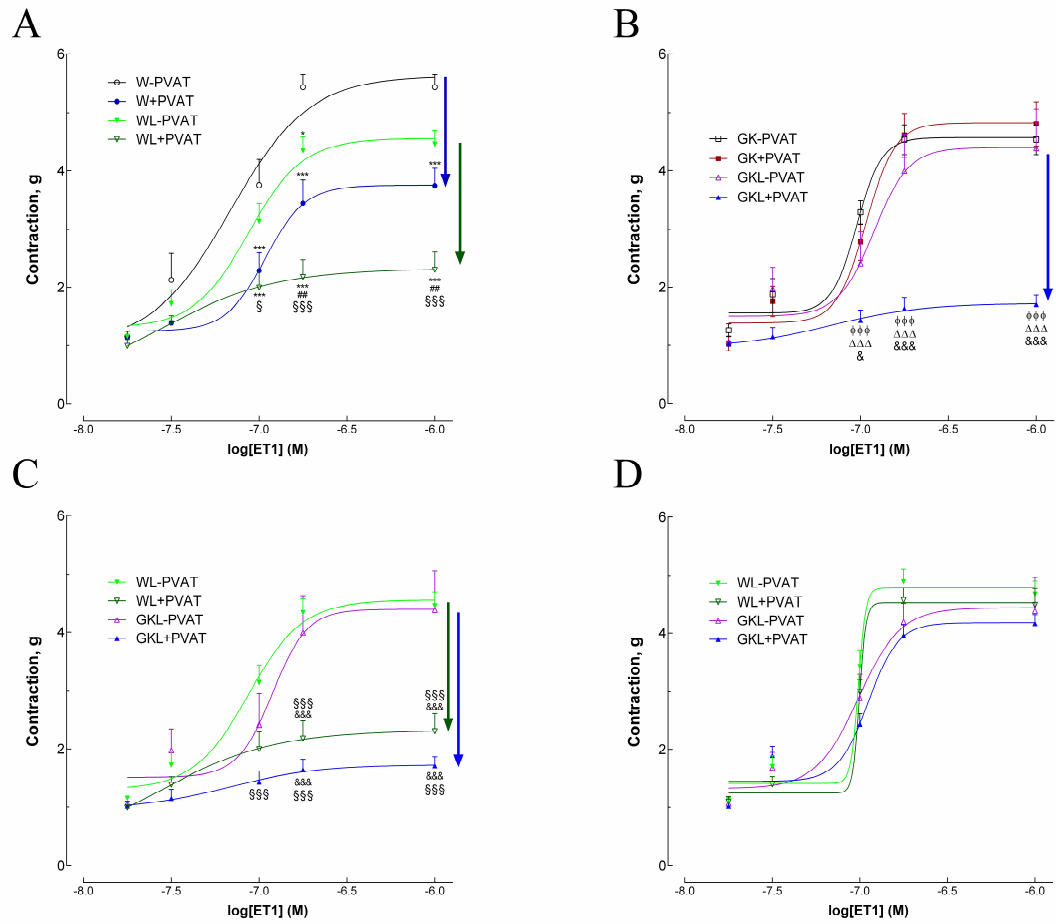

Figure S3

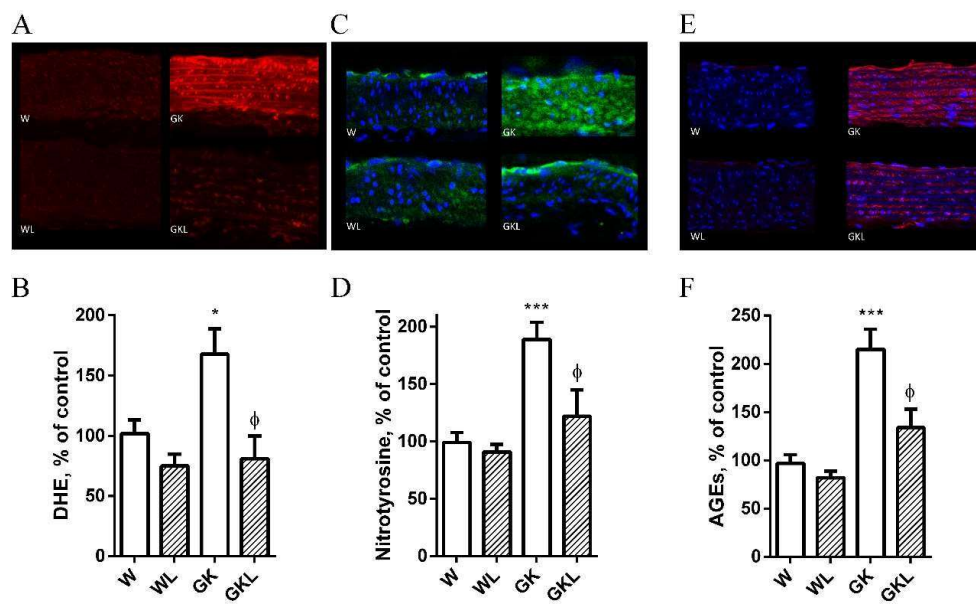

Figure S4



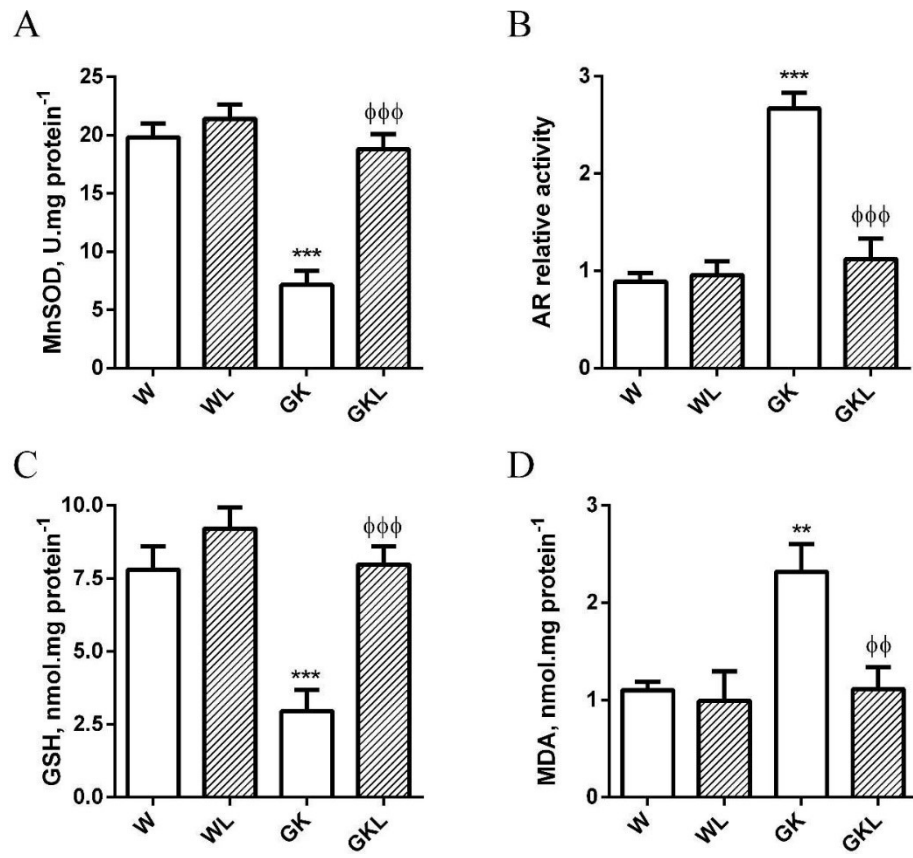

Figure S5

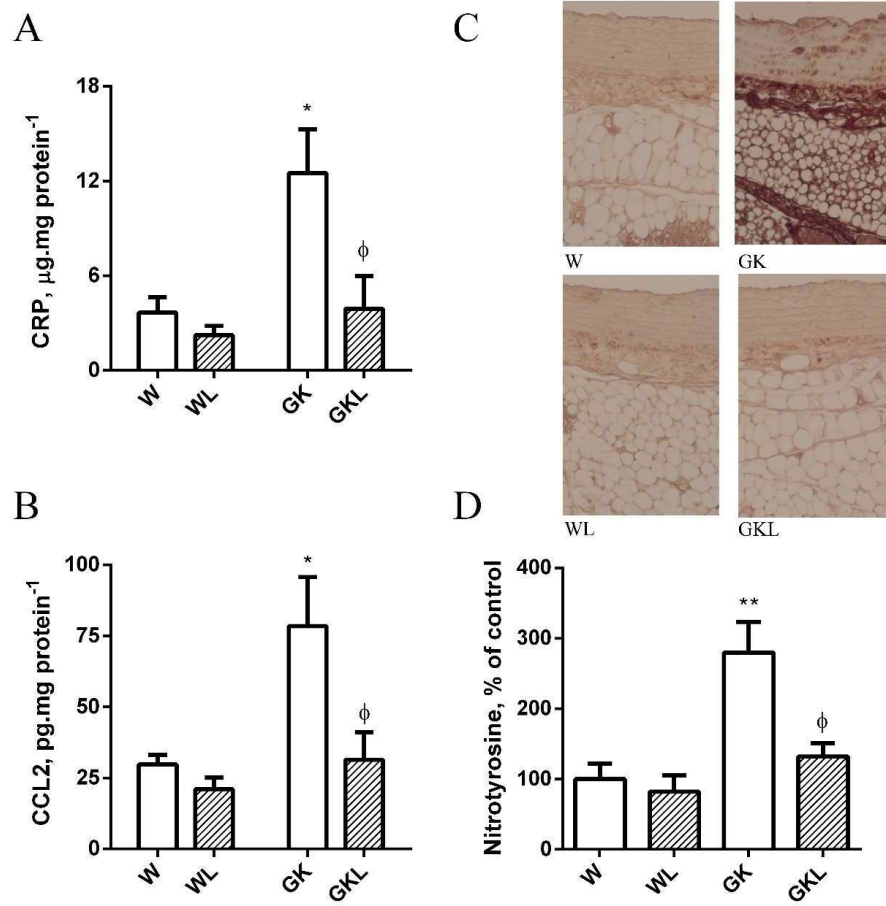

Figure S6

Supplement: s1 [file s1]
